# Supplementary material
Source: HighWire-hosted journal article supplement (https://cmaj.ca/highwire/filestream/57757/field_highwire_adjunct_files/2/acute-holroyd-3-at.pdf)
Supplement: acute-holroyd-3-at.pdf [file acute-holroyd-3-at.pdf]

**Appendix 3** (as supplied by the authors): Summary of included studies (part 1)

| Source                                | Setting                                                            | No. of participants   | Mean age (range) | % female | Study design                                                                                                                      | Study type                                                                                               |
|---------------------------------------|--------------------------------------------------------------------|-----------------------|------------------|----------|-----------------------------------------------------------------------------------------------------------------------------------|----------------------------------------------------------------------------------------------------------|
| Parker et al., 1986 <sup>1</sup>      | Acute arthritis clinic in Glasgow, UK                              | 150                   | 45 (13–85)       | 45       | Prospective cohort                                                                                                                | Differential diagnosis                                                                                   |
| Freed et al., 1980 <sup>2</sup>       | ED in an academic hospital in LA, USA                              | 59                    | 41 (16–75)       | 37       | Prospective cohort                                                                                                                | Approach to diagnosis                                                                                    |
| Shmerling et al., 1990 <sup>3</sup>   | Consecutive SF samples from swollen, painful joints in Boston, USA | 100                   | NA               | NA       | Prospective cohort                                                                                                                | Evaluation of diagnostic tests in diagnosing inflammatory v. noninflammatory arthritis                   |
| Jeng et al., 1997 <sup>4</sup>        | ED in an academic-hospital in Taiwan                               | 75                    | NA               | NA       | Prospective cohort                                                                                                                | Evaluation of the role of SF TNF- $\alpha$ , IL-1 $\beta$ and IL-6 levels in diagnosing septic arthritis |
| Zhang et al., 2006 <sup>5</sup>       | NA                                                                 | 181 studies           | NA               | NA       | Systematic review (of RCTs, controlled trials, observational studies, economic evaluations and meta-analysis,) consensus document | Development of evidence-based recommendations for gout                                                   |
| Margaretten et al., 2007 <sup>6</sup> | NA                                                                 | 14 studies (n = 6242) | NA               | NA       | Systematic review (of cohort studies, case–control studies and case–series)                                                       | Evaluation of the clinical examine for nongonococcal septic arthritis                                    |

**Appendix 3: Summary of included studies (part 2)**

| Source                                | Recruitment method and sampling/data sources                                                                                                                     | Diagnostic test or criteria                                                                                  | Reference test                                                                                                 | Blinding  | Attrition of participants                                                                                                         | Statistical method                                                                     |
|---------------------------------------|------------------------------------------------------------------------------------------------------------------------------------------------------------------|--------------------------------------------------------------------------------------------------------------|----------------------------------------------------------------------------------------------------------------|-----------|-----------------------------------------------------------------------------------------------------------------------------------|----------------------------------------------------------------------------------------|
| Parker et al., 1986 <sup>1</sup>      | Local general practitioners/hospital services contacted by letter and phone, requesting referral of acute arthropathy over a 1-yr period; unclear if consecutive | Broad screen of investigations (lab and radiology), aspiration of symptomatic joints                         | NA                                                                                                             | NA        | 21 excluded because not acute arthritis                                                                                           | Percentages                                                                            |
| Freed et al., 1980 <sup>2</sup>       | All patients presenting to the ED with monoarthritis (excluding trauma) over a 10 mo period                                                                      | Defined criteria that incorporated appropriate clinical, radiological, laboratory and synovial fluid results | NA                                                                                                             | NA        | 10% lost to follow-up                                                                                                             | Proportions; percentages                                                               |
| Shmerling et al., 1990 <sup>3</sup>   | Consecutive synovial fluid specimens received by haematology or chemistry lab over 1 yr                                                                          | Synovial fluid WBC count, % PMNs in SF, SF glucose level, SF protein, SF LDH                                 | Standard criteria without regard to results of synovial fluid WBC count, differential, glucose, protein or LDH | Not clear | 31 excluded from SF test results (5 other diagnosis, 26 no diagnosis), additionally missing SF data from: 22/69 LDH, 1/69 protein | Proportions; Wilcoxon signed rank, Spearman correlation, ROC, sensitivity, specificity |
| Jeng et al., 1997 <sup>4</sup>        | Patients presenting to ED with acute arthritis, possibly septic, over a 2 yr period, unclear if consecutive                                                      | Serum and synovial fluid TNF- $\alpha$ levels, SF IL-1 $\beta$ and IL-6 levels, serum and SF WBC count, ESR  | Diagnosis according to the ARA criteria                                                                        | Not clear | Complete                                                                                                                          | $\chi^2$ test, Kruskal-Wallis                                                          |
| Zhang et al., 2006 <sup>5</sup>       | MEDLINE, EMBASE, CINAHL, Science Citation Index and Cochrane                                                                                                     | NA                                                                                                           | NA                                                                                                             | NA        | NA                                                                                                                                | Method of pooling unclear, 95% CI presented                                            |
| Margaretten et al., 2007 <sup>6</sup> | PubMed and EMBASE                                                                                                                                                | History, physical examination, blood and/or SF results                                                       | + culture or Gram stain, + blood culture, pus in aspirate, and/or antibiotic response                          | NA        | NA                                                                                                                                | Random effects model with 95% CI                                                       |

ARA = American Rheumatology Association, CI = confidence interval, CINAHL = Cumulative Index to Nursing and Allied Health Literature, ED = emergency department, ESR = erythrocyte sedimentation rate, LDH = lactate dehydrogenase, NA = not applicable, PMN = polymorphonuclear cells, RCT = randomized control trial, ROC = Receiver Operator Characteristic, SF = serum ferritin, TNF = tumour necrosis factor, WBC = white blood cell.

## References

1. Parker JD, Capell HA. An acute arthritis clinic — one year's experience. *Br J Rheumatol* 1986;25:293-5.
2. Freed JF, Nies KM, Boyer RS, et al. Acute monoarticular arthritis. A diagnostic approach. *JAMA* 1980;243:2314-6.
3. Shmerling RH, Delbanco TL, Tosteson AN, et al. Synovial fluid tests. What should be ordered? *JAMA* 1990;264:1009-14.
4. Jeng GW, Wang CR, Liu ST, et al. Measurement of synovial tumor necrosis factor-alpha in diagnosing emergency patients with bacterial arthritis. *Am J Emerg Med* 1997;15:626-9.
5. Zhang W, Doherty M, Pascual E, et al. EULAR evidence based recommendations for gout. Part I: Diagnosis. Report of a task force of the Standing Committee for International Clinical Studies Including Therapeutics (ESCSIT). *Ann Rheum Dis* 2006;65:1301-11.
6. Margaretten ME, Kohlwes J, Moore D, et al. Does this adult patient have septic arthritis? *JAMA* 2007;297:1478-88.
